# Supplementary material for: High Incidence of Intracerebral Hemorrhaging Associated with the Application of Low-Intensity Focused Ultrasound Following Acute Cerebrovascular Injury by Intracortical Injection
Source: MDPI journal article supplement (doi:10.3390/pharmaceutics14102120), 2022-10-06
Supplement: s1 [file s1]

# Supplementary Materials: High Incidence of Intracerebral Hemorrhaging Associated with the Application of Low-Intensity Focused Ultrasound following Acute Cerebrovascular Injury by Intracortical Injection

Evgenii Kim, Jared Van Reet, Hyun-Chul Kim, Kavin Kowsari and Seung-Schik Yoo

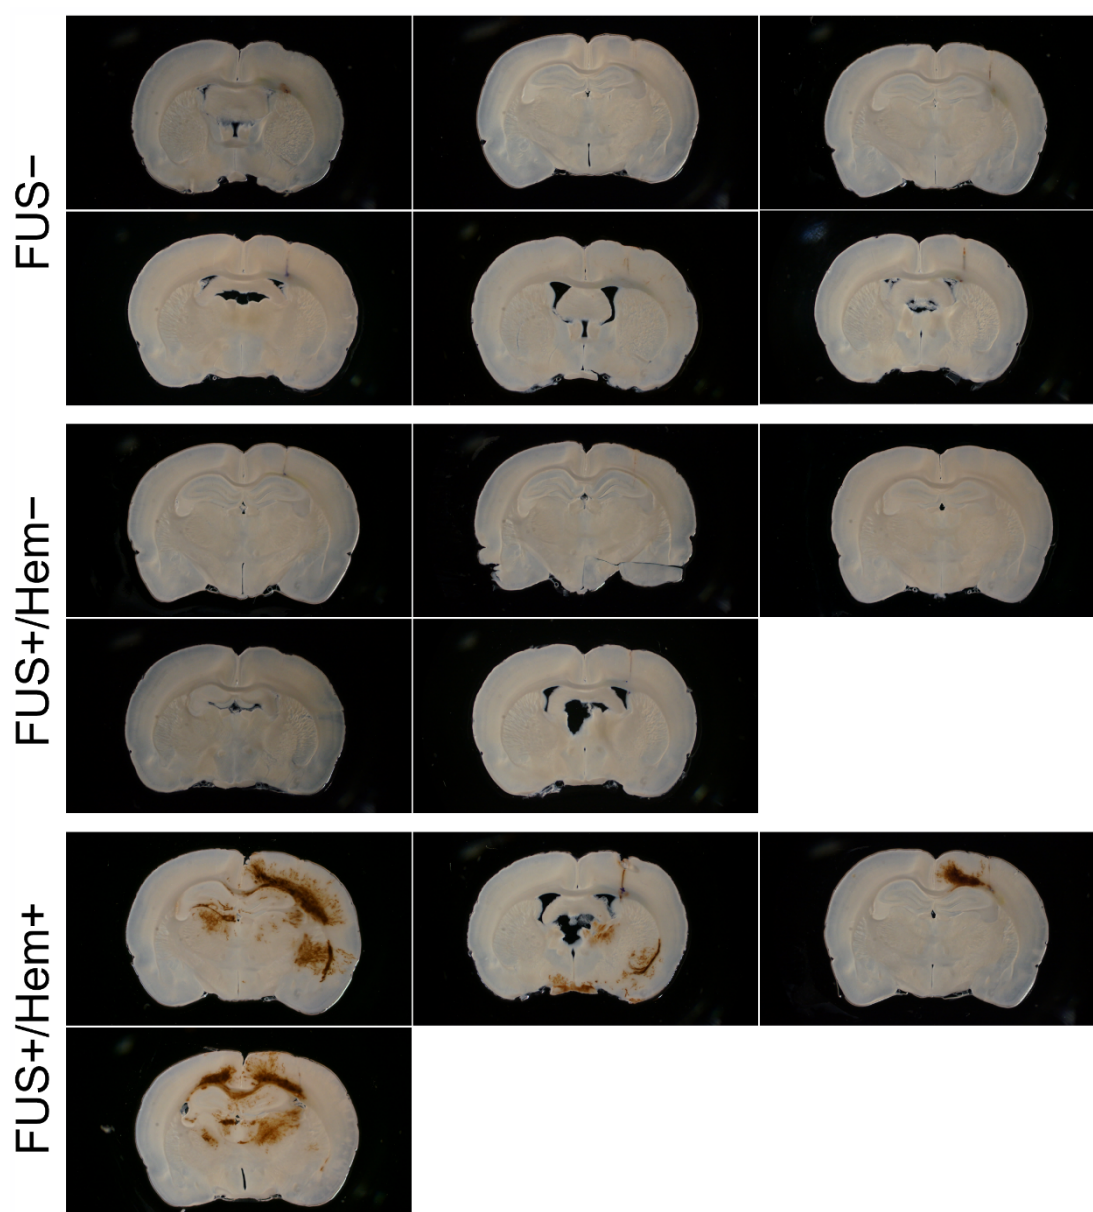

**Figure S1. Animal-specific Bright-field Images at the Injection Site.** The purple-brown hue visible at the injection site among FUS-/Hem- and FUS+/Hem- animals indicates the spatial distribution of OA and FITC-d in the needle path.
